# Supplementary material for: Structural modification of resveratrol analogue exhibits anticancer activity against lung cancer stem cells via suppression of Akt signaling pathway
Source: Springer Nature journal article supplement (doi:10.1186/s12906-023-04016-6), 2023-06-03

Figure 6 Supplemental C

A549 cells

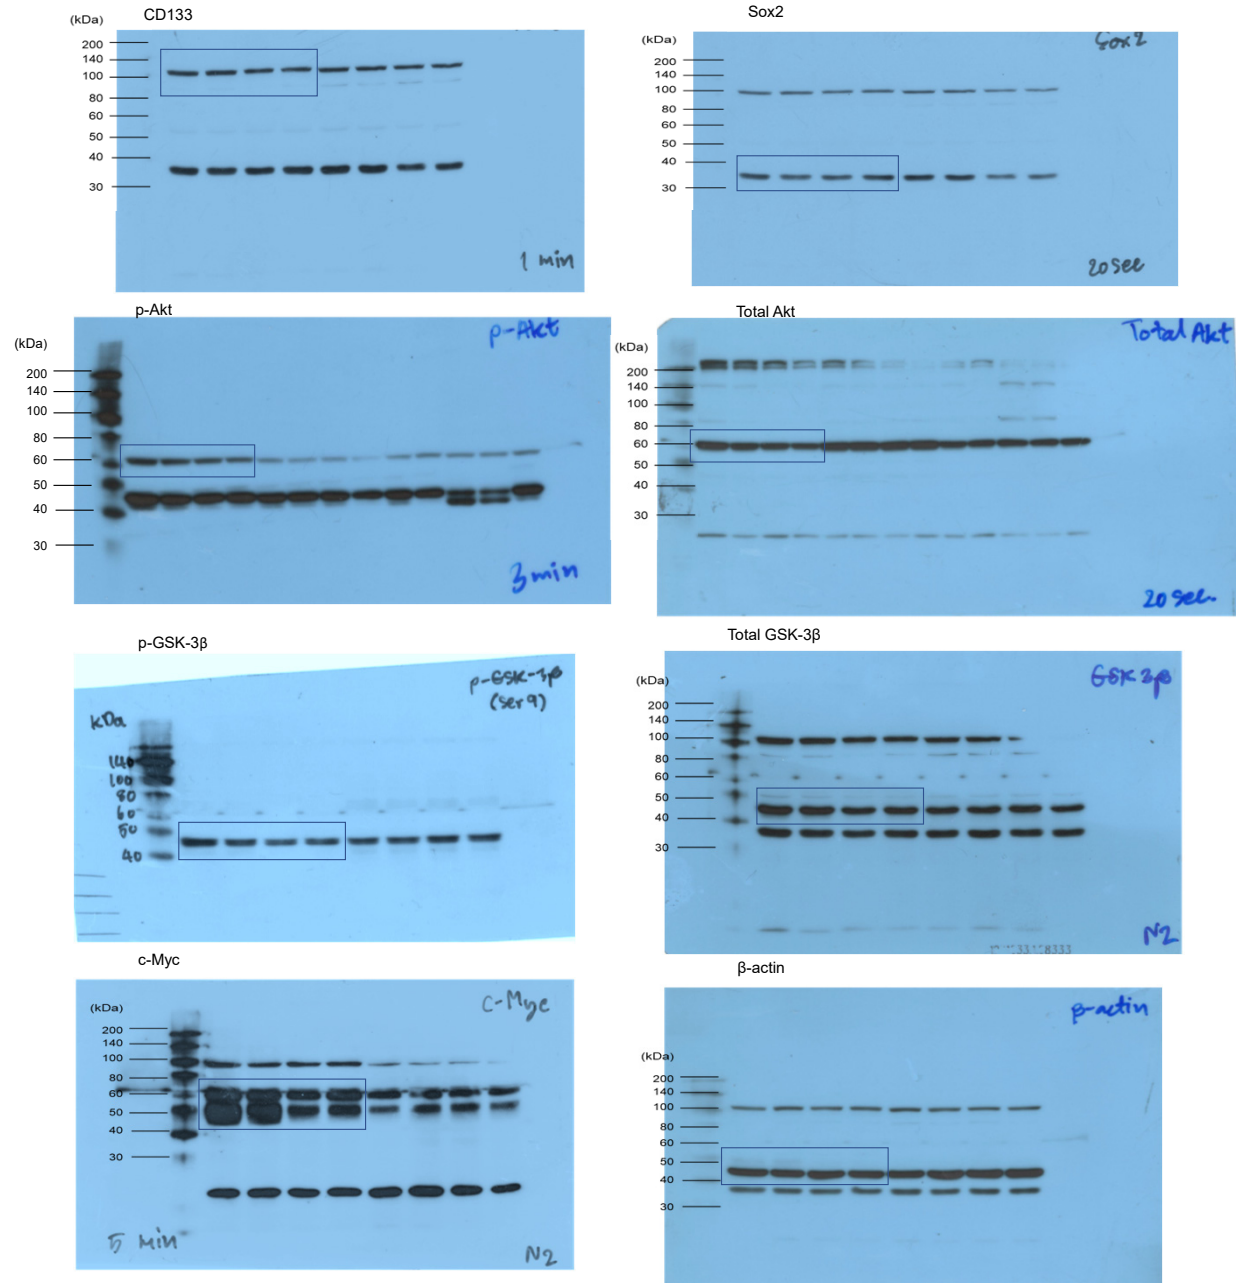

H23 cells

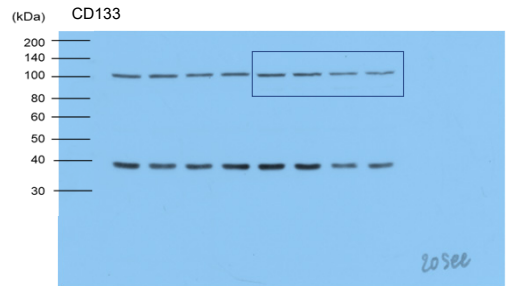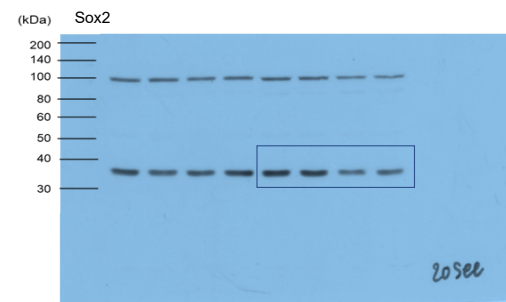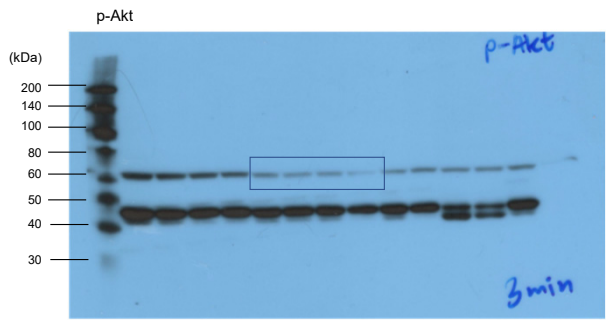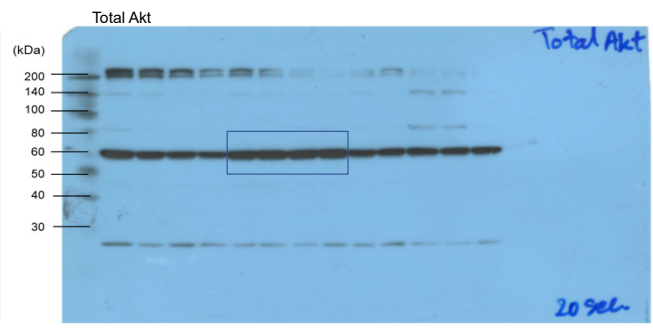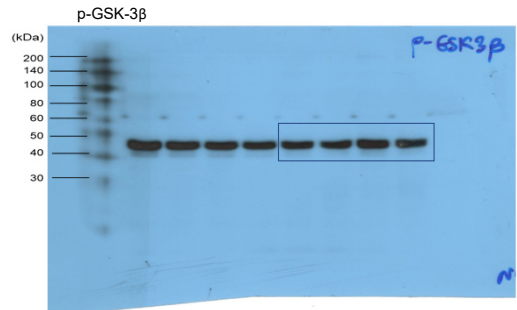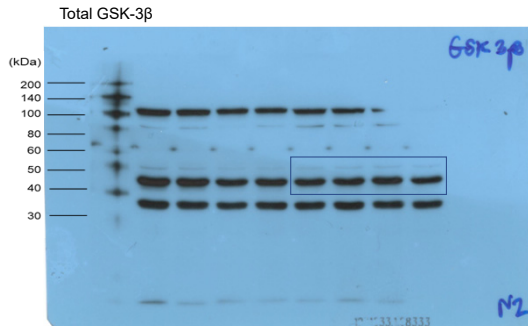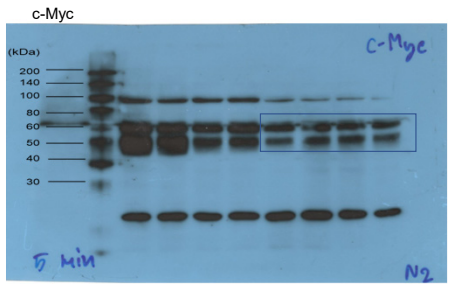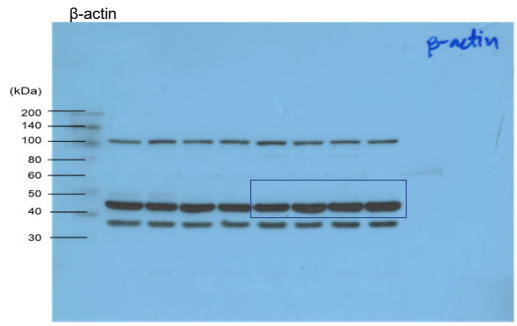

Supplement: MOESM1 [file 25445682]
